# Supplementary material
Source: publisher site journal article supplement (https://www.dovepress.com/article/472398)
Supplement: Supplementary file 1 [file get_supplementary_file.php]

**Supplementary Table 1 original data Missing Ratio(n=3063)**

| Variable | number | percentage |
| --- | --- | --- |
| Age | 3031 | 92.9 |
| Systolic pressure | 1099 | 33.7 |
| Diastolic pressure | 1099 | 33.7 |
| BMI | 1069 | 32.8 |
| Heart rate | 1283 | 39.3 |
| Red blood cell count | 1774 | 54.4 |
| AST/ALT | 1722 | 52.8 |
| Glutamic oxalacetic transaminase | 1774 | 54.4 |
| Total cholesterol | 1535 | 47 |
| Triglyceride | 1535 | 47 |
| High density lipoprotein cholesterol | 1527 | 46.8 |
| Low density lipoprotein cholesterol | 1535 | 47 |
| Apolipoprotein a1 | 1031 | 31.6 |
| Apolipoprotein B | 1031 | 31.6 |
| Lipoprotein (a) | 1031 | 31.6 |
| creatinine | 302 | 9.3 |
| Uric Acid | 1419 | 43.5 |
| Serum potassium | 1779 | 54.5 |
| Serum sodium | 1779 | 54.5 |
| Blood chlorine | 1779 | 54.5 |
| Blood calcium | 1779 | 54.5 |
| Blood magnesium | 1490 | 45.6 |
| Serum phosphorus | 1493 | 45.7 |
| Cystatin C | 1348 | 41.3 |
| homocysteine | 835 | 25.6 |
| Brain natriuretic peptide | 546 | 16.7 |
| Myohaemoglobin | 1149 | 35.2 |
| troponin | 814 | 24.9 |
| Creatine Kinase Isoenzyme | 1679 | 51.4 |
| Lactate dehydrogenase | 1588 | 48.7 |
| Blood glucose | 1703 | 52.2 |
| Gender | 3262 | 99.9 |
| Hyperhomocysteinemia | 3263 | 100 |
| Smoking | 1592 | 100 |
| Drinking | 1076 | 100 |
| PCI | 1059 | 100 |
| Cerebral stroke | 3263 | 100 |
| Hyperlipidaemia | 3263 | 100 |
| Diabetes | 3263 | 100 |
| Arrhythmia | 3263 | 100 |
| Heart failure | 56 | 100 |
| Copd | 3263 | 100 |
| Renal insufficiency | 3263 | 100 |
| Antiplatelet drug | 3263 | 100 |
| Heparins | 3263 | 100 |
| Statins | 3263 | 100 |
| Vasodilator drugs | 3263 | 100 |
| Hypotensive drugs | 3263 | 100 |
| Beta-blockers | 3263 | 100 |

**Supplementary Table 2 Delete missing percentage after the missing ratio is greater than 20% samples (n=1058)**

| Variable | number | percentage |
| --- | --- | --- |
| Age | 997 | 94.2 |
| Systolic pressure | 750 | 70.9 |
| Diastolic pressure | 750 | 70.9 |
| BMI | 717 | 71.8 |
| Heart rate | 849 | 80.2 |
| Red blood cell count | 1041 | 98.4 |
| AST/ALT | 1057 | 99.9 |
| Glutamic oxalacetic transaminase | 1058 | 100 |
| Total cholesterol | 1057 | 99.9 |
| Triglyceride | 1057 | 99.9 |
| High density lipoprotein cholesterol | 1056 | 99.8 |
| Low density lipoprotein cholesterol | 1057 | 99.9 |
| Apolipoprotein a1 | 849 | 80.2 |
| Apolipoprotein B | 849 | 80.2 |
| Lipoprotein (a) | 849 | 80.2 |
| creatinine | 215 | 20.3 |
| Uric Acid | 1001 | 94.6 |
| Serum potassium | 1058 | 100 |
| Serum sodium | 1058 | 100 |
| Blood chlorine | 1058 | 100 |
| Blood calcium | 1058 | 100 |
| Blood magnesium | 1014 | 95.8 |
| Serum phosphorus | 1013 | 95.7 |
| Cystatin C | 980 | 92.6 |
| homocysteine | 642 | 60.7 |
| Brain natriuretic peptide | 310 | 29.3 |
| Myohaemoglobin | 754 | 71.3 |
| troponin | 604 | 57.1 |
| Creatine Kinase Isoenzyme | 1052 | 99.4 |
| Lactate dehydrogenase | 1029 | 97.3 |
| Blood glucose | 1051 | 99.3 |
| Gender | 1057 | 99.9 |
| Hyperhomocysteinemia | 1058 | 100 |
| Smoking | 608 | 100 |
| Drinking | 432 | 100 |
| PCI | 369 | 100 |
| Cerebral stroke | 1058 | 100 |
| Hyperlipidaemia | 1058 | 100 |
| Diabetes | 1058 | 100 |
| Arrhythmia | 1058 | 100 |
| Heart failure | 25 | 2.4 |
| Copd | 1058 | 100 |
| Renal insufficiency | 1058 | 100 |
| Antiplatelet drug | 1058 | 100 |
| Heparins | 1058 | 100 |
| Statins | 1058 | 100 |
| Vasodilator drugs | 1058 | 100 |
| Hypotensive drugs | 1058 | 100 |
| Beta-blockers | 1058 | 100 |

In this paper, all the measured data underwent normality test and did not obey normality, as shown in Supplementary Table 3.

**Supplementary Table 3 Measurement data normality test**

| Variable | Z | *P* |
| --- | --- | --- |
| Age(years) | 0.057 | <0.001 |
| Heart rate (heart rate) | 0.094 | <0.001 |
| **Laboratory index** | |  |
| Red blood cell count(1012/L) | 0.064 | <0.001 |
| Blood glucose(mmol/L) | 0.218 | <0.001 |
| Lactate dehydrogenase(U/L) | 0.285 | <0.001 |
| BMI(kg/m2) | 0.060 | <0.001 |
| Apolipoprotein a1(g/L) | 0.040 | <0.001 |
| Creatine Kinase Isoenzyme(U/L) | 0.382 | <0.001 |
| Serum potassium(mmol/L) | 0.054 | <0.001 |
| Glutamic oxalacetic transaminase(U/L) | 0.347 | <0.001 |
| Blood magnesium(mmol/L) | 0.095 | <0.001 |
| Blood calcium(mmol/L) | 0.076 | <0.001 |
| Serum sodium (mmol/L) | 0.149 | <0.001 |
| Systolic pressure(mmHg) | 0.088 | <0.001 |
| Diastolic pressure(mmHg) | 0.085 | <0.001 |
| AST/ALT | 0.144 | <0.001 |
| Total cholesterol(mmol/L) | 0.064 | <0.001 |
| Triglyceride(mmol/L) | 0.192 | <0.001 |
| High density lipoprotein cholesterol (mmol/L) | 0.307 | <0.001 |
| Low density lipoprotein cholesterol (mmol/L) | 0.068 | <0.001 |
| Apolipoprotein B (g/L) | 0.081 | <0.001 |
| Lipoprotein (a) (g/L) | 0.129 | <0.001 |
| Uric Acid (mmol/L) | 0.072 | <0.001 |
| Blood chlorine (mmol/L) | 0.129 | <0.001 |
| Serum phosphorus (mmol/L) | 0.084 | <0.001 |
| Cystatin C (mg/L) | 0.212 | <0.001 |
| Myohaemoglobin (g/L) | 0.327 | <0.001 |

In this paper, GridSearchCV is used to optimize the hyper-parameters in the training set using the 5-fold cross-validation. The specific parameter ranges and selections for each model are shown in Supplementary Table 4.

**Supplementary Table 4 Parameter selection range and optimal parameter**

| Models | Parameter selection range | Model usage parameters |
| --- | --- | --- |
| Balanced Random Forest | n_estimators(10 - 200) , criterion(“gini”, “entropy”) , max_depth(1,5,10,20,40,60,None) , min_samples_split(1,1.5, 2,5,8.5,10) , min_samples_leaf(0.5, 1,3,5.5,8,10.5) , bootstrap(True,Flase) , oob_score(True,Flase) , replacement(True,Flase) , verbose(0,1,5,10,20,40) , warm_start(True,Flase) , random_state(10,20,30,50,80) | n_estimators=180 , criterion=”gini” , max_depth=None , min_samples_split=2 , min_samples_leaf=1 , bootstrap=True , oob_score=False , replacement=False , verbose=0 , warm_start=False , random_state=30 |
| EasyEnsemble | n_estimators(10-200) , max_samples(0.2,0.5,0.7,1.0,2.0,5.0) , max_features(0.2,0.5,0.7,1.0,2.0,5.0) , bootstrap(True,False) , bootstrap_features(True,False) , oob_score(True,False) , warm_start(True,False) , verbose(1,5,9,10,20) | n_estimators=200 , max_samples=0.2 , max_features=0.2 , bootstrap=False , bootstrap_features=True , oob_score=False , warm_start=True , verbose=5 |
| RUSBoost | random_state(10-100) , n_estimators= (10-200) , learning_rate(0.3,0.4,0.5,4,0.7,0.8,1.0) , algorithm('SAMME', 'SAMME.R') , replacement(False,True) , early_termination(False,True) | random_state=13 , n_estimators= 180 , learning_rate=0.3 , algorithm=’SAMME.R’ , replacement=False , early_termination=False |
| SMOTEBoost | random_state(10-100) , n_estimators(10-200) , learning_rate(0.3,0.4,0.5,4,0.7,0.8,1.0) , algorithm('SAMME', 'SAMME.R') , k_neighbors(1,2,4,5,10,15) | random_state=42 ,  n_estimators=100 ,  learning_rate=0.5 ,  algorithm=’SAMME’  k_neighbors=1 |
| AdaBoost | n_estimators(10-200) , algorithm ('SAMME', 'SAMME.R') , learning_rate(0.3,0.7,1.0,1.5,5.0,6.5,10) , | algorithm=’SAMME’ , n_estimators=13 , learning_rate=1 |
| Logistic | max_iter(5,10,20,50,70) , penalty ('l1', 'l2', 'elasticnet', 'none') , dual(True,Flase) | max_iter=20 ,  penalty=l2 ,  dual=Flase |
